# Supplementary material for: A mobile biosafety microanalysis system for infectious agents
Source: Sci Rep. 2015 Mar 30;5:9505. doi: 10.1038/srep09505 (PMC4377622; doi:10.1038/srep09505)
Supplement: Supplementary Information [file srep09505-s1.pdf]

## **Supplemental Information**

### **A mobile biosafety microanalysis system for infectious agents**

Daniel R. Beniac<sup>1</sup>, Shannon L. Hiebert<sup>1</sup>, Christine G. Siemens<sup>1</sup>, Cindi R. Corbett<sup>1,2</sup>,  
and Tim F. Booth<sup>1,2\*</sup>

**1 National Microbiology Laboratory, Public Health Agency of Canada, 1015 Arlington Street, Winnipeg, Manitoba, R3E 3R2, Canada.**

**2 Department of Medical Microbiology, University of Manitoba, Winnipeg, Manitoba, R3E 0W3, Canada.**

**\*E-mail: [tim.booth@phac-aspc.gc.ca](mailto:tim.booth@phac-aspc.gc.ca)**

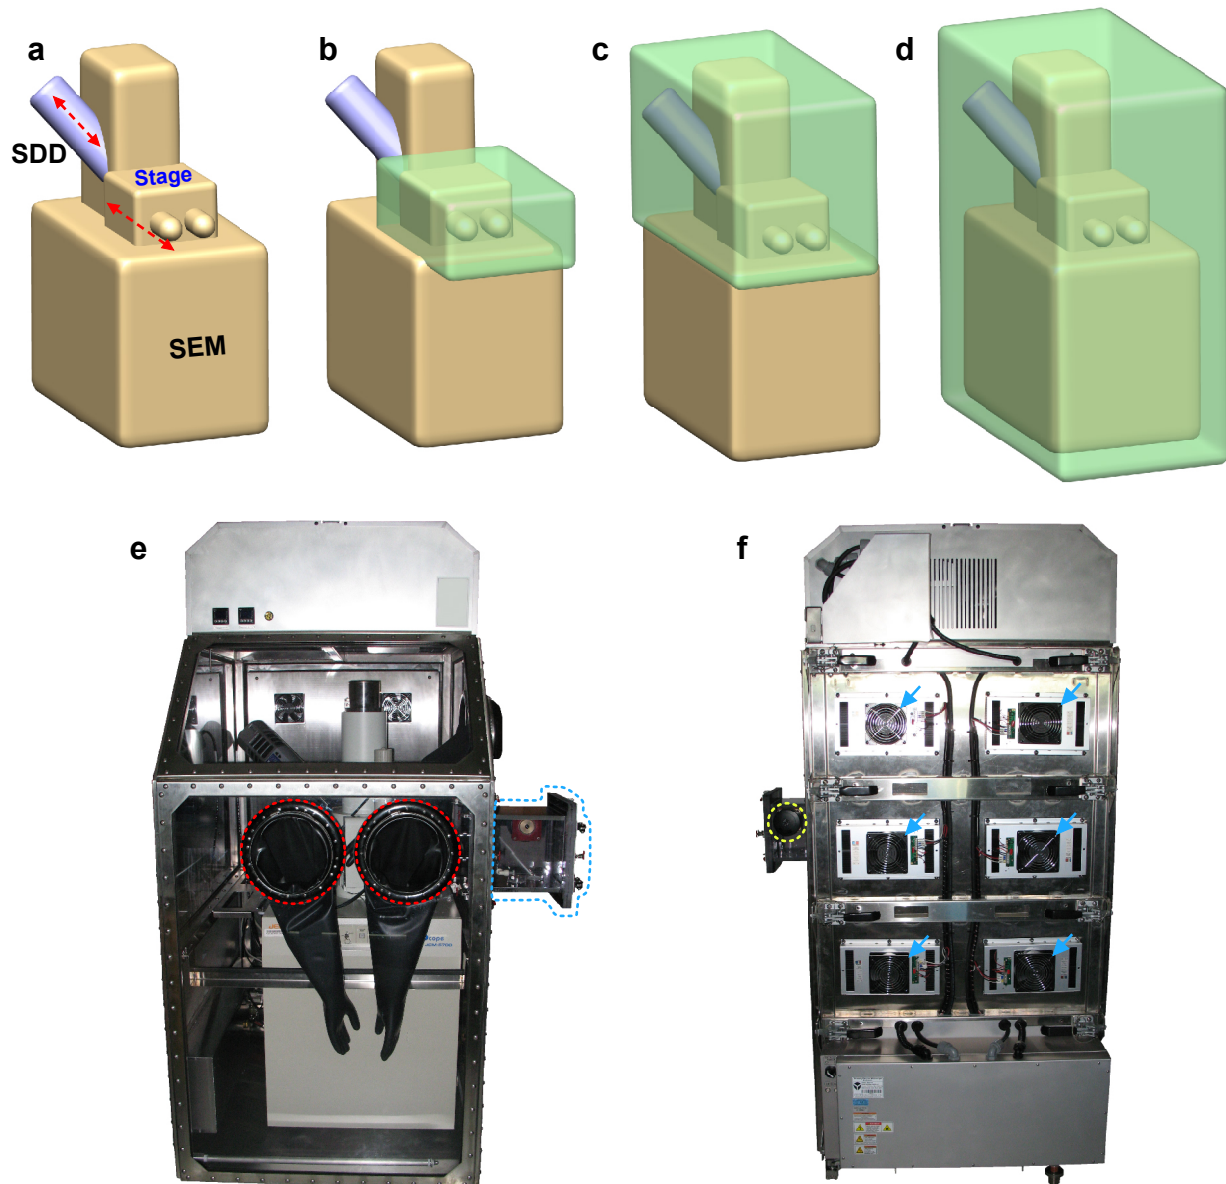

**Supplemental Figure 1** | Design of the SEM enclosure. (a) Computer drawing of the scanning electron microscope (SEM) equipped with silicon drift detector (SDD) for X-ray microanalysis. The red arrows indicate the movements. The three alternative enclosure designs are (b) stage only, (c) top portion of microscope including optical column, and (d) entire microscope. The prototype enclosure shown from two perspectives (e,f). The specimen pass-through chamber is indicated by a blue dashed outline, and glove ports are highlighted in red (e). The HEPA filter on the pass through chamber is circled in yellow, and the six Peltier coolers are indicated by blue arrows (f).

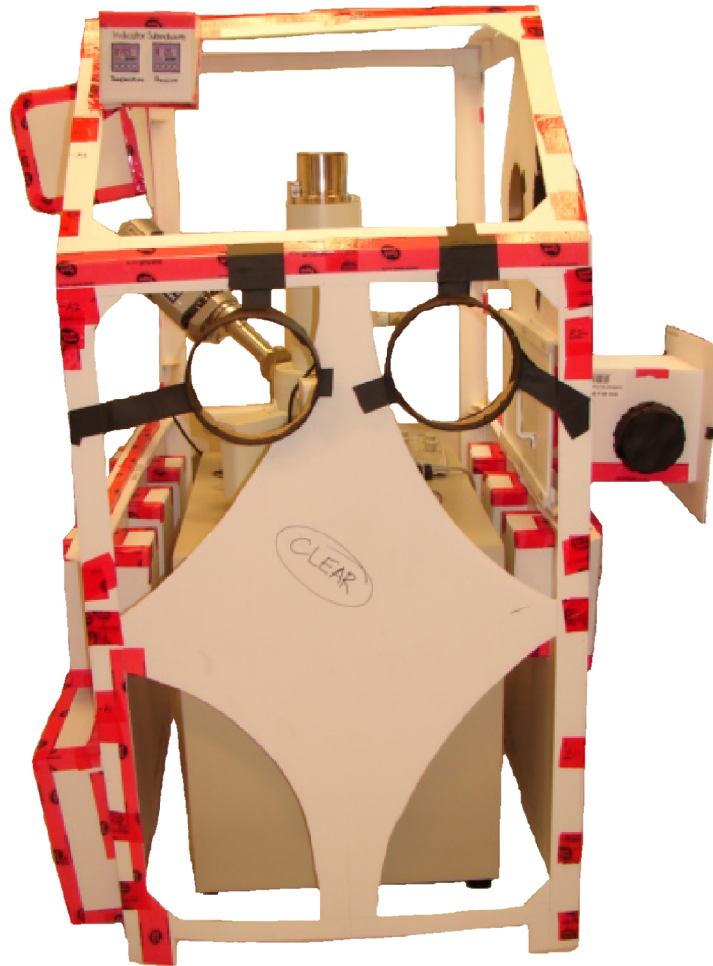

**Supplemental Figure 2** | A full operation trial of the microscope with a mock-up of the enclosure in place was undertaken. This allowed adjustments of the design to be made before final manufacturing. Testing included: operation of the electrical bulkhead to ensure correct function, making sure that the glove ports were ergonomically positioned to allow easy specimen exchange, aperture alignment, and filament replacement.

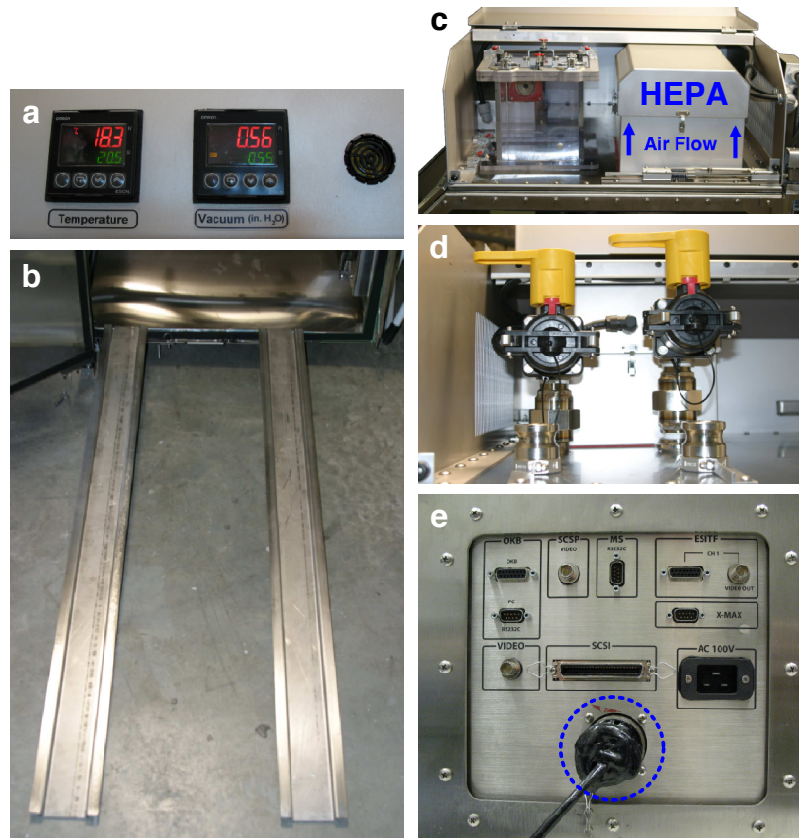

**Supplemental Figure 3** | Features of the final manufactured SEM enclosure. Close-up images of the temperature and pressure gauges (**a**), and the 150 cm ramp (**b**) are shown. The HEPA filter is shown with the direction of air flow in blue (**c**), the vaporous hydrogen peroxide ports (**d**: yellow), and the electrical bulkhead (**e**). The general purpose port is indicated by the dashed blue circle (**e**).

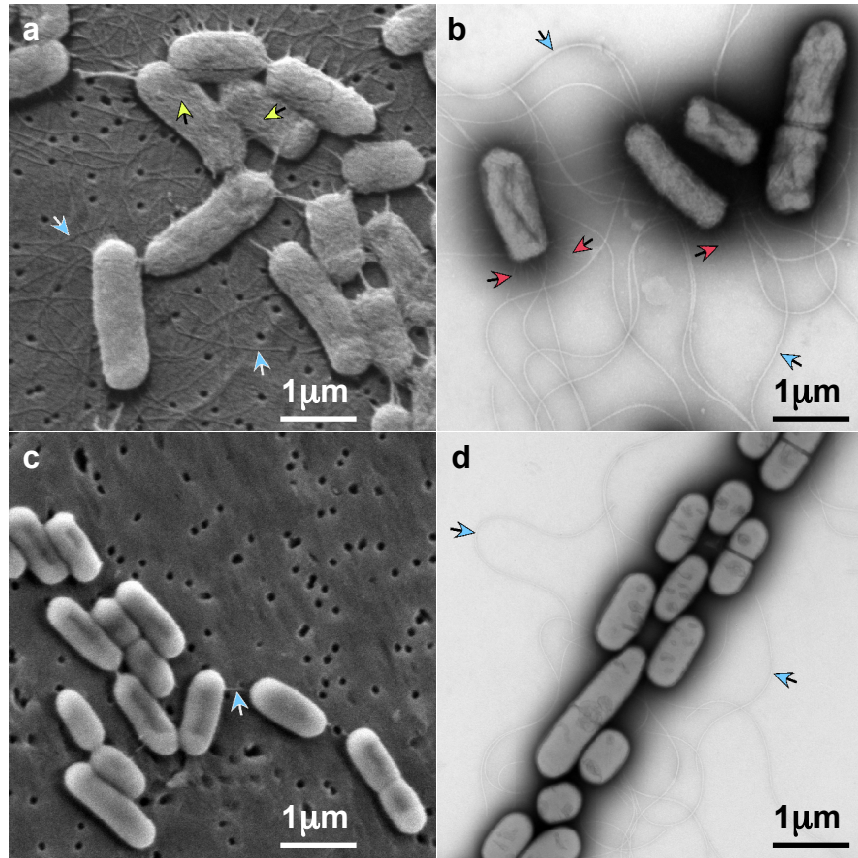

**Supplemental Figure 4** | Additional images of biological samples. Images were acquired using both SEM (**a,c**), and TEM (**b,d**). Specimens were *Salmonella* (non-Typhi) (**a,b**), *Listeria monocytogenes* (**c,d**). Color code for arrows: flagellae, (blue arrows); fimbriae on the substrate, (red); fimbriae on the surface of bacterial cells, (yellow).

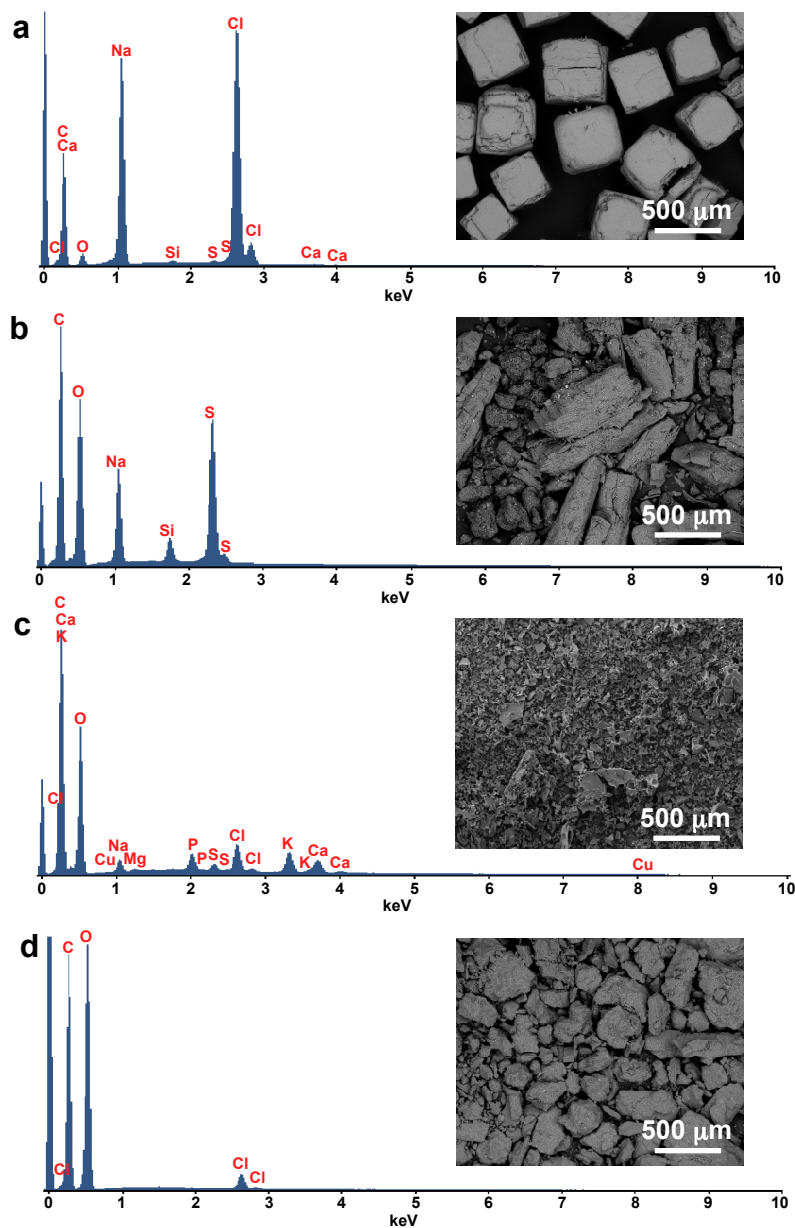

**Supplemental Figure 5** | SEM images and X-ray spectra of mock-bioterrorist agents. The four “white powder” agents shown are **(a)** table salt, **(b)** sodium cyclamate based artificial sweetener, **(c)** lyophilized milk, and **(d)** sucralose based artificial sweetener. SEM images are presented at the same magnification to show the differences in particle size and shape of the samples.

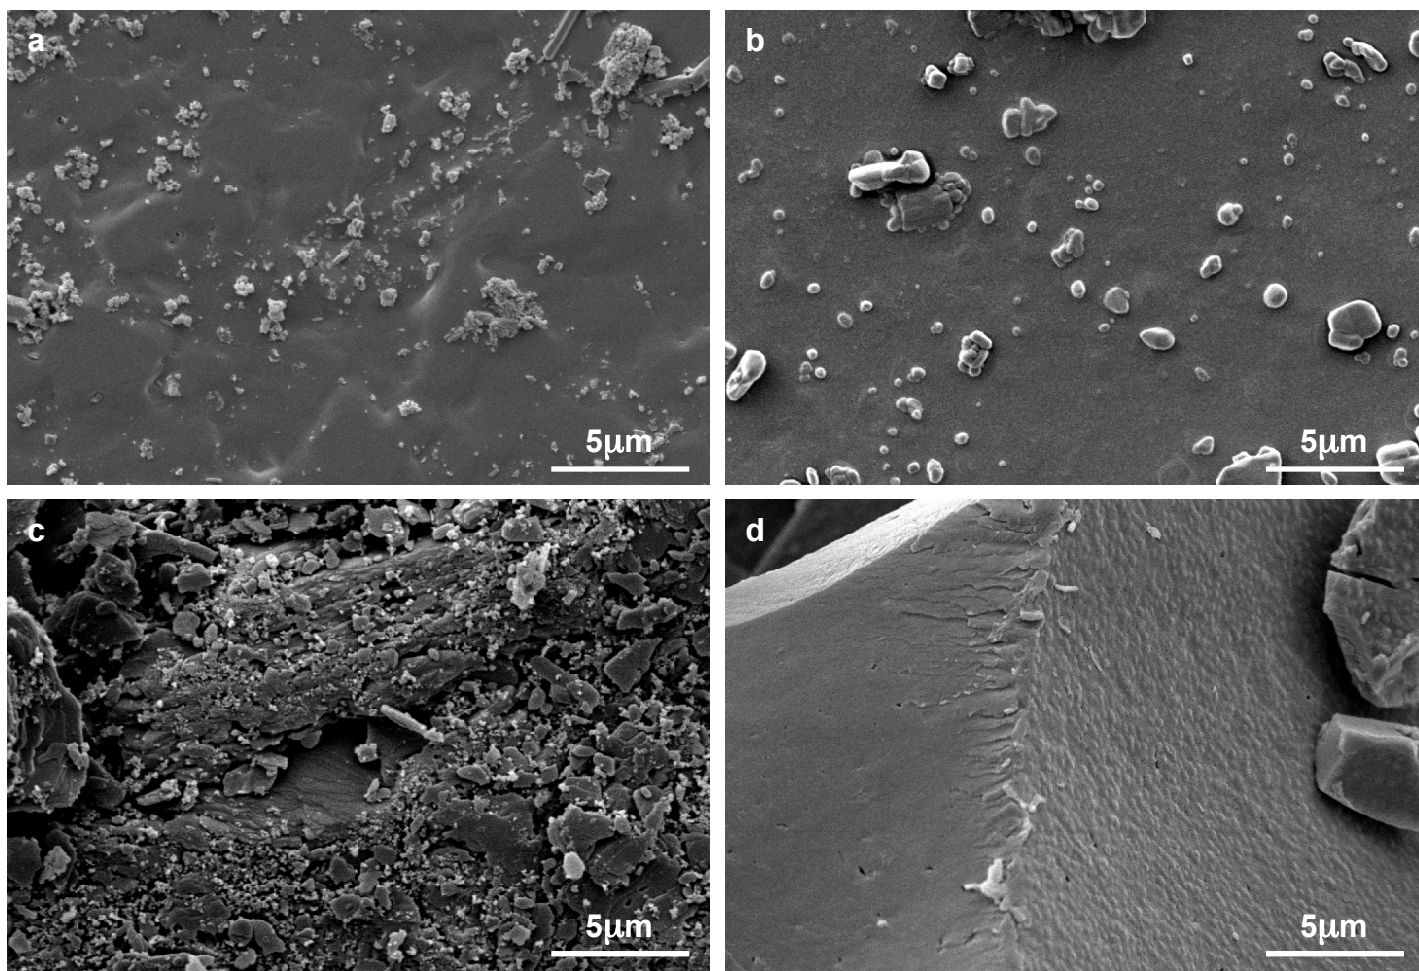

**Supplemental Figure 6** | Higher magnification SEM images of “white powder” mock-bioterrorist agents; (a) table salt, (b) sugar, (c) sodium cyclamate based artificial sweetener, and (d) lyophilized milk.

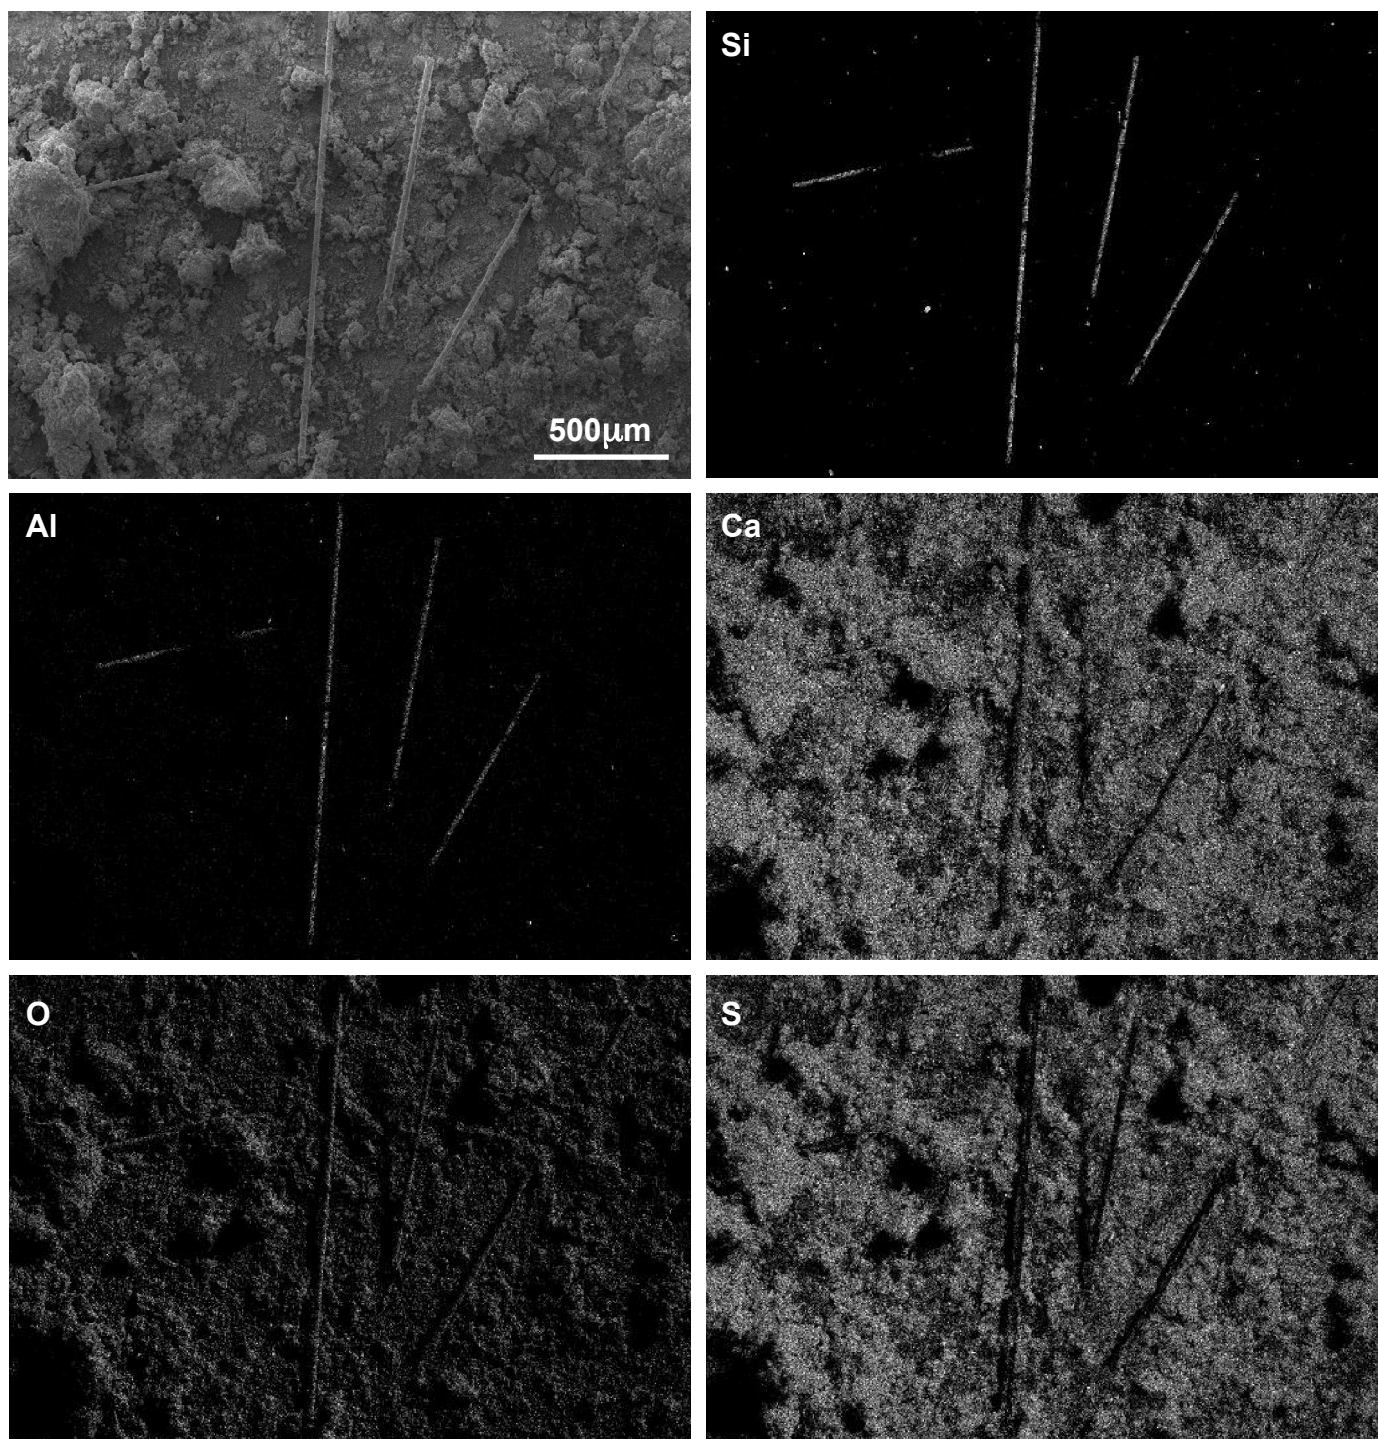

**Supplemental Figure 7** | SEM image of crushed gypsum board (top left), and corresponding elemental images. Gypsum board (also known as plasterboard, wallboard, or drywall) is composed of dihydrous calcium sulfate ( $\text{CaSO}_4 \cdot 2\text{H}_2\text{O}$ ). These elements give rise to the strong Ca, O, and S maps, whereas the glass fibers in the board give rise to the Si and Al signals.
